# Supplementary material for: 24‐Week Exposure to Oxidized Tyrosine Induces Hepatic Fibrosis Involving Activation of the MAPK/TGF‐β1 Signaling Pathway in Sprague‐Dawley Rats Model
Source: Hindawi journal article supplement (doi:10.1155/2016/3123294), 2015-12-14

# Graphical Abstract

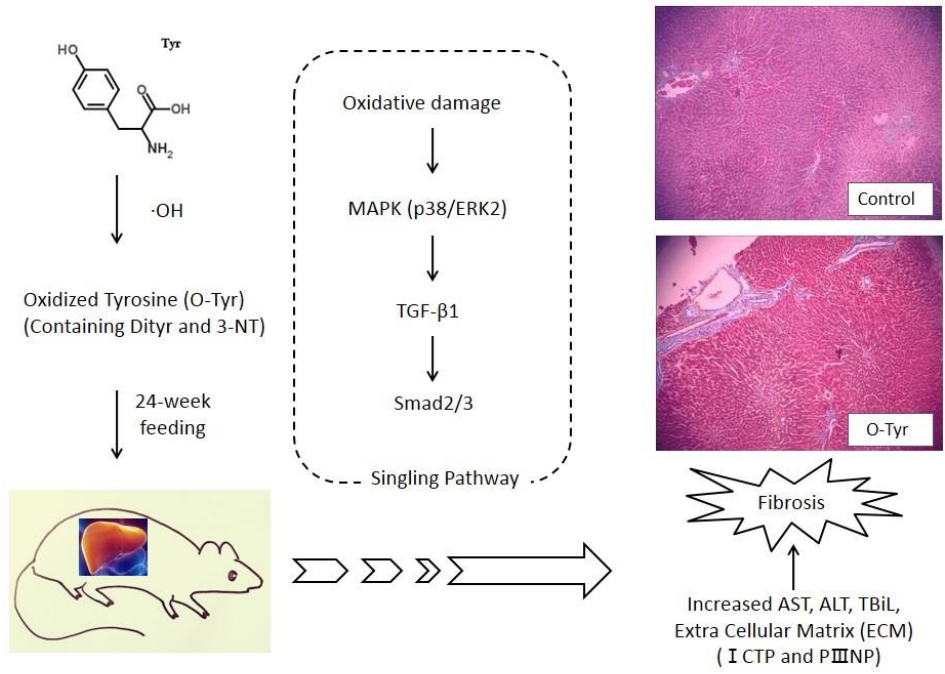

Supplement: f1 [file 3123294.f1.pdf]
